interscalene brachial plexus block for shoulder surgery in the outpatient setting: A randomized controlled patient- and assessor-blinded trial. *Reg Anesth Pain Med* 2017; 42:310–8

36. Rajpal G, Winger DG, Cortazzo M, Kentor ML, Orebaugh SL: Neurologic outcomes after low-volume, ultrasound-guided interscalene block and ambulatory shoulder surgery. *Reg Anesth Pain Med* 2016; 41:477–81

37. Michael J. Fredrickson, Katherine R. Smith, Andrew C. Wong: Importance of volume and concentration for ropivacaine interscalene block in preventing recovery room pain and minimizing motor block after shoulder surgery. *ANESTHESIOLOGY* 2010; 112:1374–81

38. Breivik H, Borchgrevink PC, Allen SM, Rosseland LA, Romundstad L, Hals EK, Kvarstein G, Stubhaug A: Assessment of pain. *Br J Anaesth* 2008; 101:17–24

## ANESTHESIOLOGY REFLECTIONS FROM THE WOOD LIBRARY-MUSEUM

### Dr. Frank A. Shattuck's Unfolding “Specialty, the Administration of Nitrous Oxide Gas”

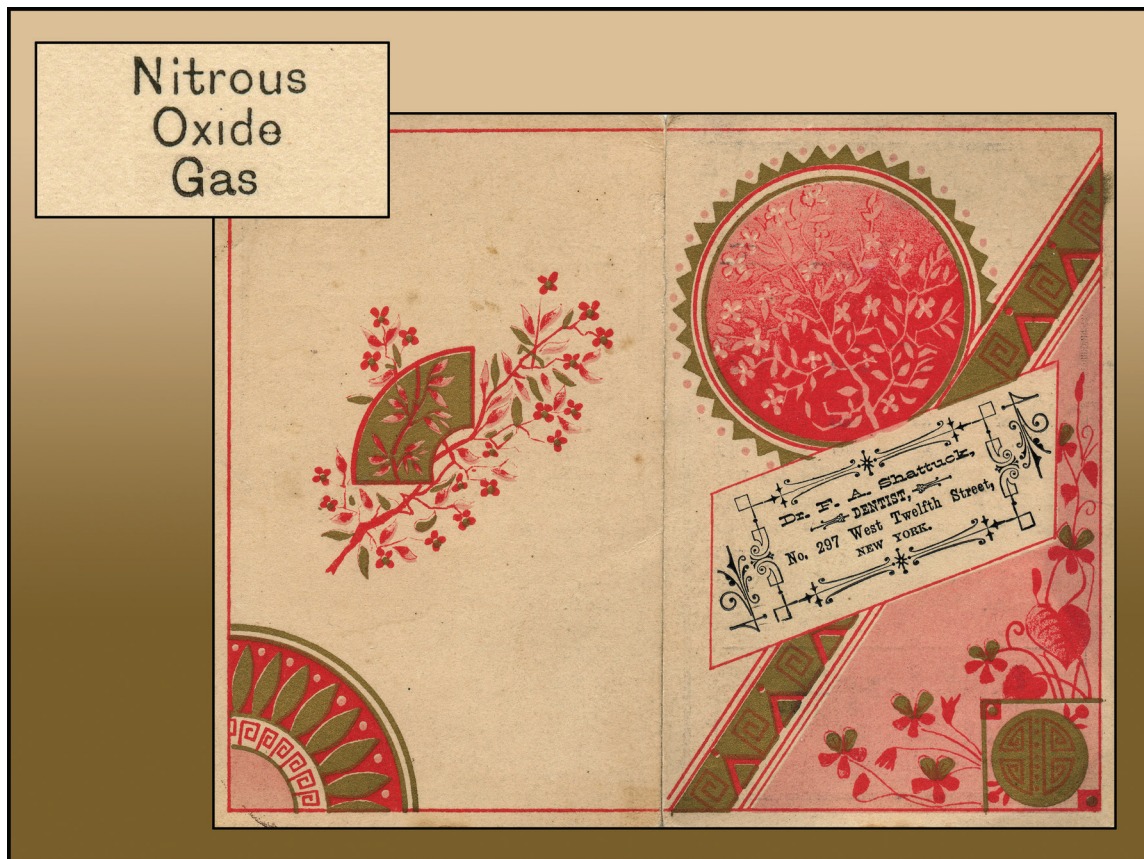

According to New York City directories, Dr. Frank Alton Shattuck ran his dental office at 297 West Twelfth Street from roughly 1883 through 1887. So, this four-page advertising folder (*lower right*) was apparently printed sometime in the mid-1880s. Trained under a dental preceptor, Dr. Shattuck advertised his practice as embracing “all branches of the profession.” On the inside of this elegant folder from the Wood Library-Museum’s Ben Z. Swanson Collection, Dr. Shattuck trumpets that his practice includes “as a specialty, the administration of Nitrous Oxide Gas” (*upper left*). (Copyright © the American Society of Anesthesiologists’ Wood Library-Museum of Anesthesiology.)

George S. Bause, M.D., M.P.H., Honorary Curator and Laureate of the History of Anesthesia, Wood Library-Museum of Anesthesiology, Schaumburg, Illinois, and Clinical Associate Professor, Case Western Reserve University, Cleveland, Ohio. [UJYC@aol.com](mailto:UJYC@aol.com).
